# Supplementary figures and images for: The Expression Pattern of Insulin-Like Growth Factor Subtype 3 (igf3) in the Orange-Spotted Grouper Epinephelus coioides and Its Function on Ovary Maturation
Source: MDPI journal article supplement (doi:10.3390/ijms24032868), 2023-02-02

Supplementary information

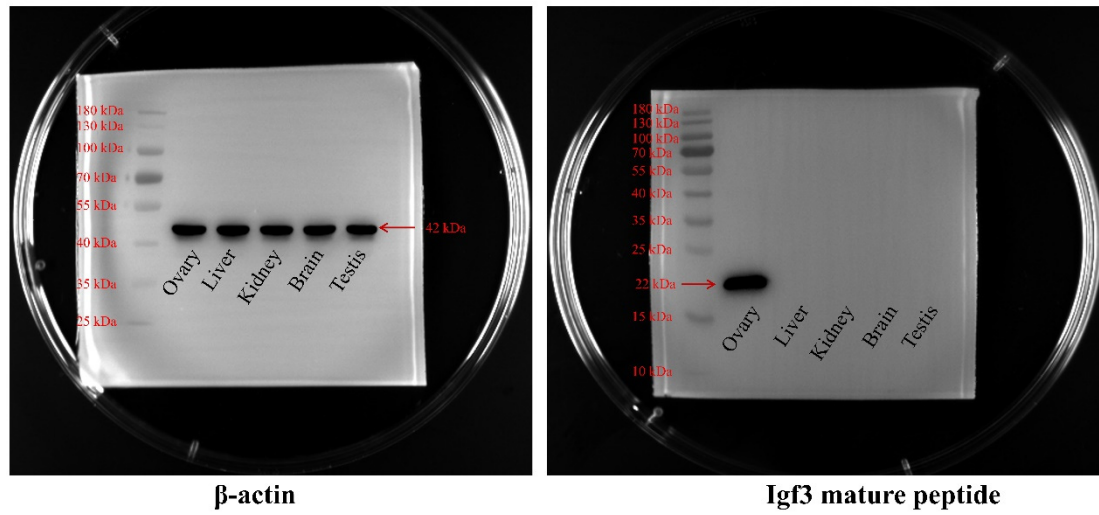

**Figure S1.** Original Western blot verification of Igf3.

Supplement: s1 [file s1]
